# Supplementary material for: Hydraulic Tests of the PZ0 Gear Micropump and the Importance Rank of Its Design and Operating Parameters
Source: MDPI journal article supplement (doi:10.3390/en15093068), 2022-04-22

# AZOLLA ZS

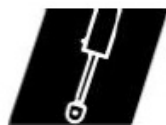

Lubrication

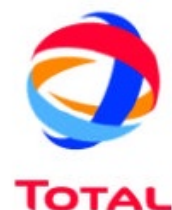

Very high performance anti-wear hydraulic oils.

## APPLICATIONS

### Hydraulic circuits

- Designed for use in all kind of hydraulic systems running under the most difficult conditions, such as in machine tools, mould injection machines, presses and other industrial or mobile equipment.
- Also used in many other applications, where an universal high performance anti-wear lubricant is the first choice : low charged gears, sliding and roller bearings, air compressors, servo-motors and control systems equipped with fine filtration systems.

## SPECIFICATIONS

### International specifications

- AFNOR NF E 48-603 HM
- ISO 6743/4 HM
- DIN 51524 P2 HLP
- CINCINNATI MILACRON P68, P69, P70
- VICKERS M-2950S, -I286
- DENISON HF0, HF1, HF2 (T6H20C)

### OEM

## ADVANTAGES

### Long equipment life time

- High protection against wear insuring maximum equipment life.
- Superior thermal stability avoiding formation of sludge even at high temperature.
- Very good oxidation stability ensuring a long service life of the fluid.
- Remarkable filterability even in the presence of water.
- Excellent hydrolytic stability avoiding filter blocking.
- Excellent protection against rust and corrosion.
- Good anti-foam and air release properties by using **silicon free** components.
- Good demulsibility ensuring rapid water separation
- Reduced maintenance and operating costs.

### High operating reliability

| TYPICAL CHARACTERISTICS           | METHODS     | UNITS              | AZOLLA ZS    |      |      |      |      |      |      |
|-----------------------------------|-------------|--------------------|--------------|------|------|------|------|------|------|
|                                   |             |                    | 10           | 22   | 32   | 46   | 68   | 100  | 150  |
| Appearance (visual)               | Internal    | -                  | Clear liquid |      |      |      |      |      |      |
| Density at 15 °C                  | ISO 3675    | kg/m <sup>3</sup>  | 846          | 866  | 875  | 880  | 884  | 888  | 892  |
| Viscosity at 40 °C                | ISO 3104    | mm <sup>2</sup> /s | 10           | 22.5 | 32.0 | 45.9 | 67.5 | 97.5 | 147  |
| Viscosity at 100 °C               | ISO 3104    | mm <sup>2</sup> /s | 2.6          | 4.4  | 5.4  | 6.8  | 8.7  | 11.2 | 14.5 |
| Viscosity index                   | ISO 2909    | -                  | 100          | 102  | 102  | 100  | 100  | 100  | 97   |
| Cleveland flash point             | ISO 2592    | °C                 | 170          | 221  | 227  | 232  | 242  | 254  | 268  |
| Pour point                        | ISO 3016    | °C                 | - 33         | - 30 | - 27 | - 27 | - 21 | - 18 | - 18 |
| Filterability 0.8 µ without water | NF E 48-690 | Index (IF)         |              |      | 1    | 1.02 | 1.01 |      |      |
| Filterability 0.8 µ with water    | NF E 48-691 | Index (IF)         |              |      | 1.5  | 1.5  | 1.5  |      |      |

Above characteristics are mean values given as an information.

## TOTAL LUBRIFIANTS

### Industrie & Spécialités

8 october 2002 (supersedes 15 may 2001)

AZOLLA ZS

1/1

This lubricant used as recommended and for the application for which it has been designed does not present any particular risk.

A material safety data sheet conforming to the regulations in use in the E.C. can be obtained from your local commercial adviser or down loaded from [www.quick-fds.com](http://www.quick-fds.com).

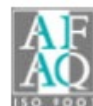

Supplement: s1 [file s1 › File S1_A data sheet containing physical and chemical parameters for the Azolla ZS oil group, including type No. 22.pdf]
