# Supplementary material for: Hydraulic Tests of the PZ0 Gear Micropump and the Importance Rank of Its Design and Operating Parameters
Source: MDPI journal article supplement (doi:10.3390/en15093068), 2022-04-22
Supplement: s1 [file s1]

Archive with 3 entries (3 files):
- File S1_A data sheet containing physical and chemical parameters for the Azolla ZS oil group, including type No. 22.pdf
- File S2_ Examples of rules generated for the induction trees in Figure 14.pdf
- File S3_The fast induction tree generation algorithm.pdf
