# Supplementary material for: Hydraulic Tests of the PZ0 Gear Micropump and the Importance Rank of Its Design and Operating Parameters
Source: MDPI journal article supplement (doi:10.3390/en15093068), 2022-04-22
Supplement: s1 [file s1 › File S2_ Examples of rules generated for the induction trees in Figure 14.pdf]

File S2. Examples of rules generated for the induction trees in Figure 14

```

1 // Reguły wygenerowano za pomocą programu
2 // DeTreeex 4.5 - generator drzew decyzyjnych
3 // =====
4 //
5 //      Plik źródłowy: "D:\Na etapie
6 //      Dane w pliku : 2 klas(y). 7
7 //
8 //      Parametry generowania drzewa
9 //
10
11 knowledge base      efficiency_c
12
13 facets
14
15     ask yes      ;
16
17     efficiency_c :
18         single no
19         val oneof
20         {
21             "|||" ,
22             "| " ,
23         };
24
25     q :
26         ask no
27         val range
28         < 0.25 , 1 >;
29
30     n :
31         ask no
32         val range
33         < 500 , 1750 >;
34
35     pt :
36         ask no
37         val range
38         < 0.17 , 22 >;
39

```

Sample Rules generation for PC shell system - part 1

```

344         nh >          7.55 ,
345         pt >          9 ,
346         qrz <=        0.602 ,
347         m >          0.7 ,
348         qrz >         0.323 ,
349         nm <=        235.62 ,
350         q <=         0.5 ;
351
352 end ;          //rules
353
354 control
355
356     char    txt1 , txt2 , txt3 ;
357
358     run ;
359     createAppWindow
360     txt1 := "Aplikacja 'efficiency_c'" ;
361     txt2 := "\n\nBaza wiedzy wygenerowana za pomocą programu\n\n DeTreeX 4.5"
362     txt3 := "© ALTECH Artificial Intelligence Laboratory, Katowice 2022"
363     vignette ( txt1 , txt2 , txt3 );
364
365     float    wart [ 7 ];
366     char      tytuł [ 3 ], nazAtr [ 7 ];
367     tytuł [ 0 ] := "Podaj wartości atrybutów..." ;
368     tytuł [ 1 ] := "Nazwa atrybutu" ;
369     tytuł [ 2 ] := "Wartość atrybutu" ;
370     nazAtr [ 0 ] := "q" ;
371     nazAtr [ 1 ] := "n" ;
372     nazAtr [ 2 ] := "pt" ;
373     nazAtr [ 3 ] := "qrz" ;
374     nazAtr [ 4 ] := "m" ;
375     nazAtr [ 5 ] := "nm" ;
376     nazAtr [ 6 ] := "nh" ;
377     nsheetBox ( 0 , 0 , 7 , 0 , tytuł , nazAtr , wart );
378     addFacts ( 7 , _ , nazAtr , wart );
379
380     goal ( "efficiency_c=X" );
381     del NewFacts ;
382
383     // <- blok instrukcji i funkcji
384
385 end ;          //control
386
387 end ;          //knowledge base

```

## Sample Rules generation for PC shell system - part 2
