# Supplementary material for: Hydraulic Tests of the PZ0 Gear Micropump and the Importance Rank of Its Design and Operating Parameters
Source: MDPI journal article supplement (doi:10.3390/en15093068), 2022-04-22
Supplement: s1 [file s1 › File S3_The fast induction tree generation algorithm.pdf]

**Classification part:**

**(input:**  $N$  set of examples;  $E$  set of attributes;

**output:** local coverage  $P$  of set  $N$ );

**begin**

$G := K$ ; {set of objects not yet covered by elements from  $P$ }

$P := \emptyset$ ;

**while**  $G \neq \emptyset$  **for**

**begin**

$P := \emptyset$ ; {execute conditional rule}

$S := G$ ; {set of objects covered by  $P$ }

**while** ( $P = \emptyset$ ) **or not** ( $[P] \subseteq K$ ) **for**

**begin**

$w := \emptyset$ ; {best candidate for elementary condition}

$w\_eval := \infty$ ; {estimation of elementary condition according to selected measure}

**for** each attribute  $a \in C$  **for**

**begin**

**if**  $eval\_new\_p < w\_eval$  **then** {check if condition new\_p is better than w}

**begin**

$w := new\_p$ ;

$w\_eval := new\_eval\_p$ ;

**end**;

**end**;{for}

$P := P \cup \{w\}$ ; {include best condition in conjunction  $P$ }

$S := S \cap [w]$ ; {limit set of objects}

**end**; {while not ( $[P] \subseteq K$ )} **for** each elementary condition  $w \in P$  **for**

**if**  $[P - \{w\}] \subseteq K$  **then**  $P := P - \{w\}$ ;

$P := P \cup \{P\}$ ;

$G := K - \cup_{P \in P} [P]$ ;

**end**; {while  $G \neq \emptyset$ }

**Calculation part:**

**for**  $i := 1$  **to**  $\text{length}(H) - 1$  **for**

**begin**

$v := (H(i) + H(i + 1)) / 2$ ; {consider as limit points only if the points divide examples belonging to different classes}

$S1 := \{x \in S \mid f(a,x) < v\}$ ; {divide objects from  $S$  according to threshold  $v$ }

$S2 := \{x \in S \mid f(a,x) \geq v\}$ ;

$eval\_t := (|S1|/|S1 \cup S2|) \cdot Ent(S1) + (|S2|/|S1 \cup S2|) \cdot Ent(S2)$ ; {calculate conditional entropy} **if**  $eval\_t < eval\_best\_t$  **then**

**begin** **if**  $|G \cap S2| \geq |G \cap S1|$  **then**  $best\_t := (f(a,x) \geq v)$  **else**  $best\_t := (f(a,x) < v)$ ;

$eval\_best\_t := eval\_t$

**end** {if}

**end**
